# Supplementary material
Source: Springer Nature journal article supplement (https://www.springermedizin.de/resource/supplementary/13075_2010_2966_MOESM2_ESM.pdf/9693296)

# PMR-AS

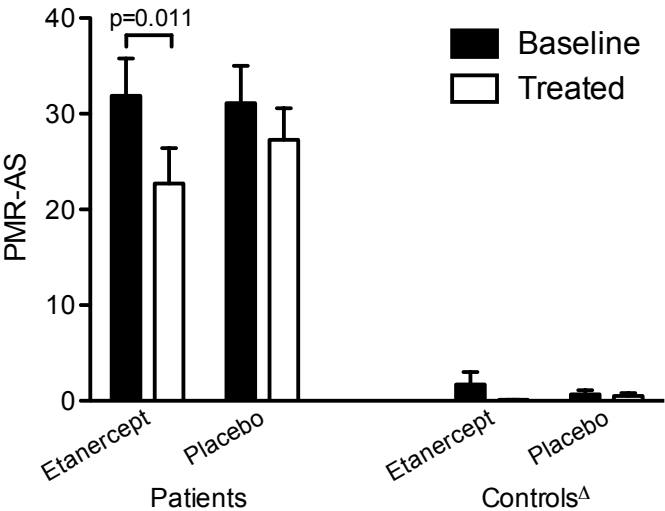

Supplement: MOESM2 [file 9693296]
